# Supplementary material for: TPM, FPKM, or Normalized Counts? A Comparative Study of Quantification Measures for the Analysis of RNA-seq Data from the NCI Patient-Derived Models Repository
Source: Springer Nature journal article supplement (doi:10.1186/s12967-021-02936-w), 2021-06-22
Supplement: MOESM1 [file 19283550]

Figure S1A

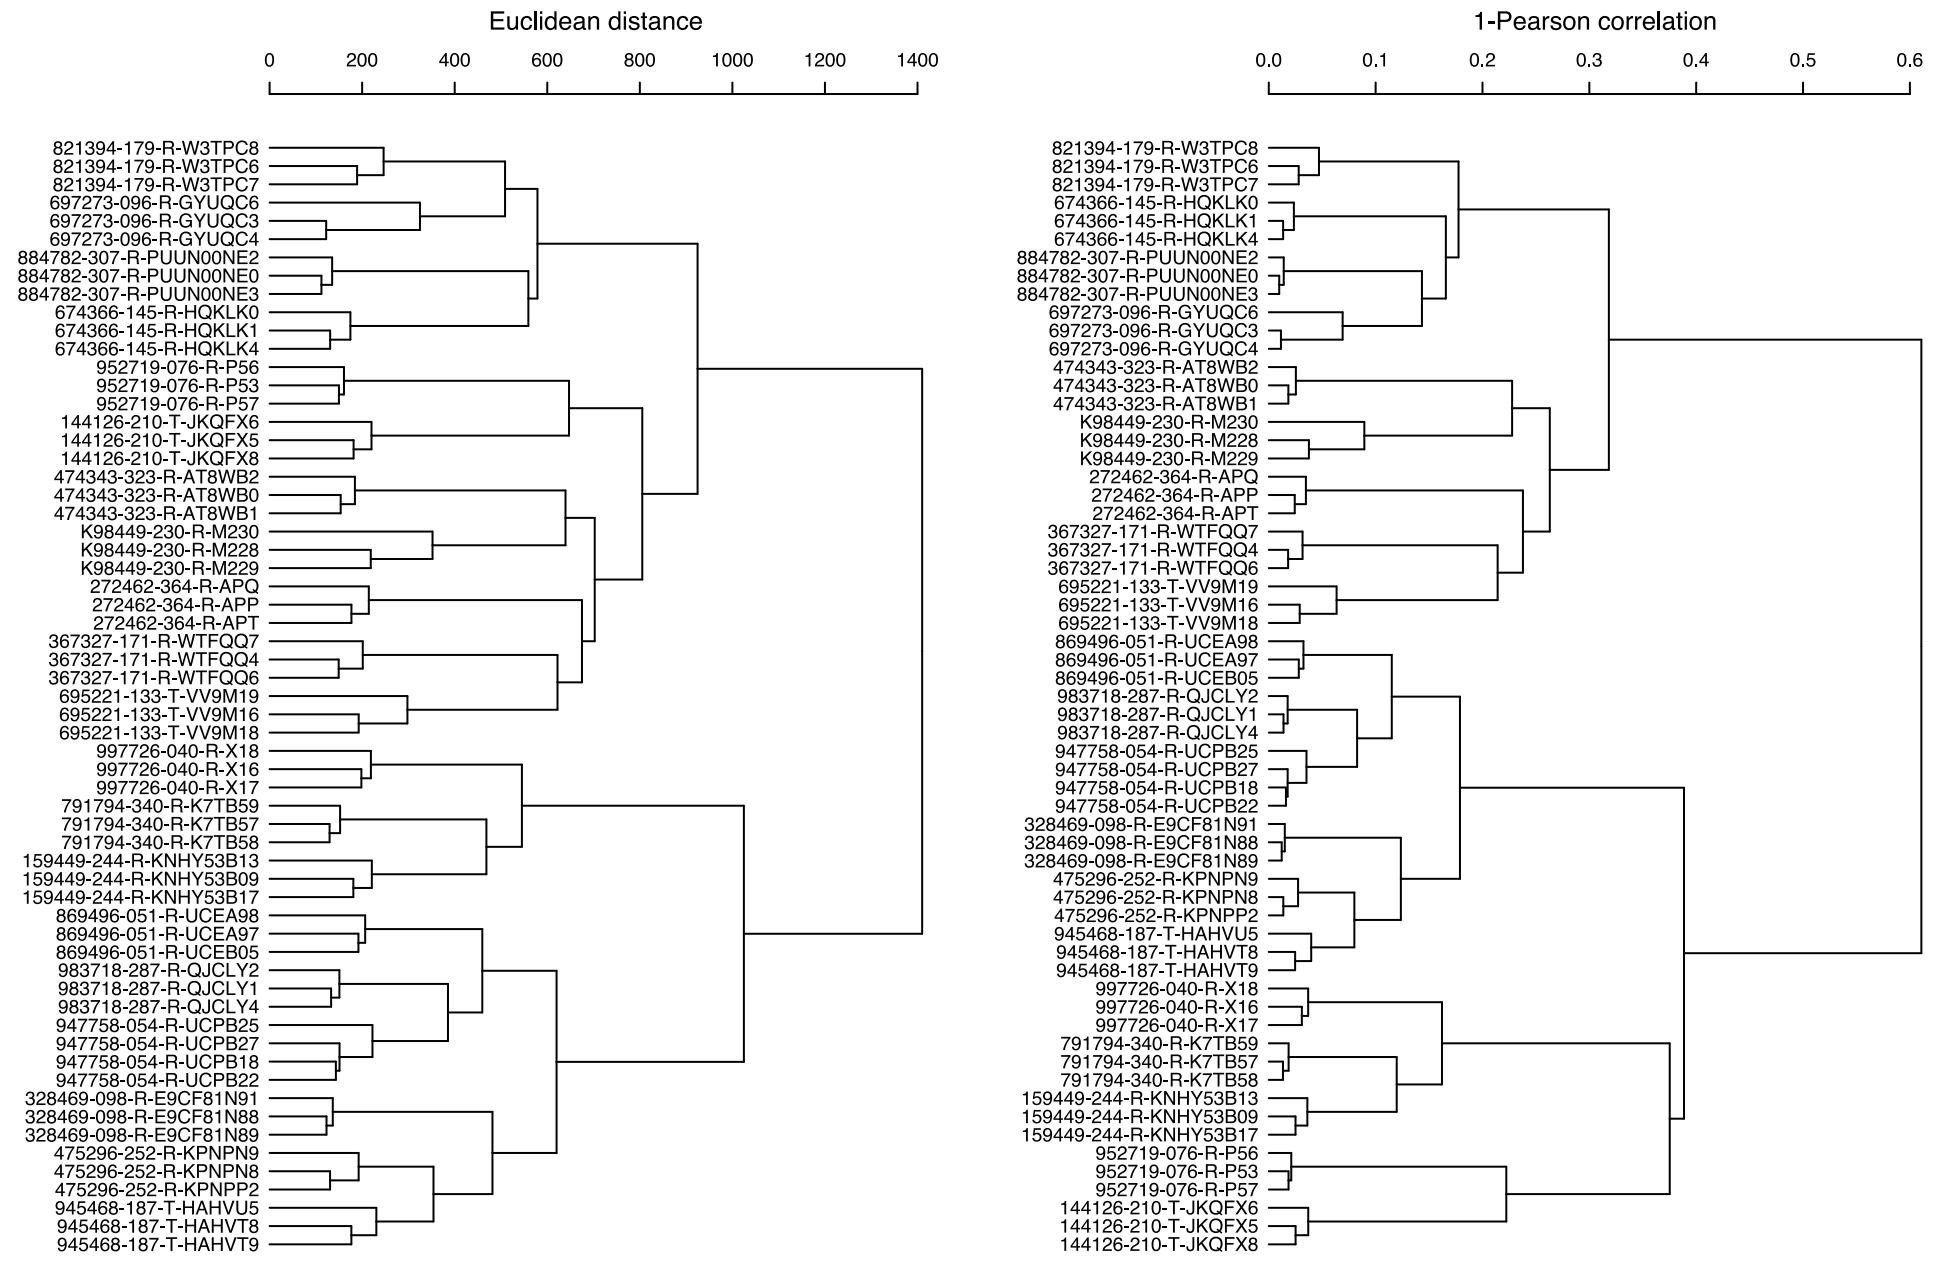

Figure S1B

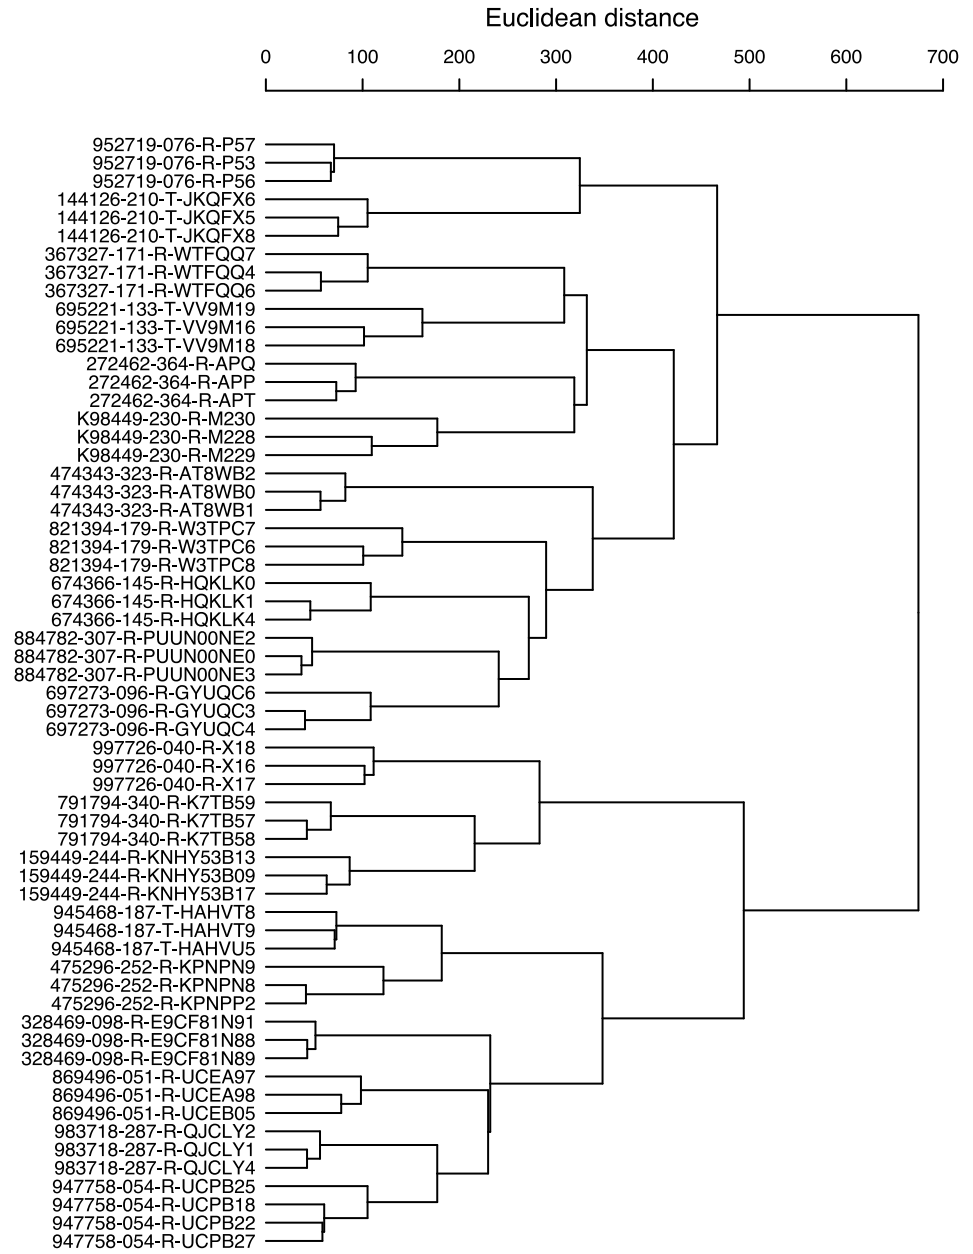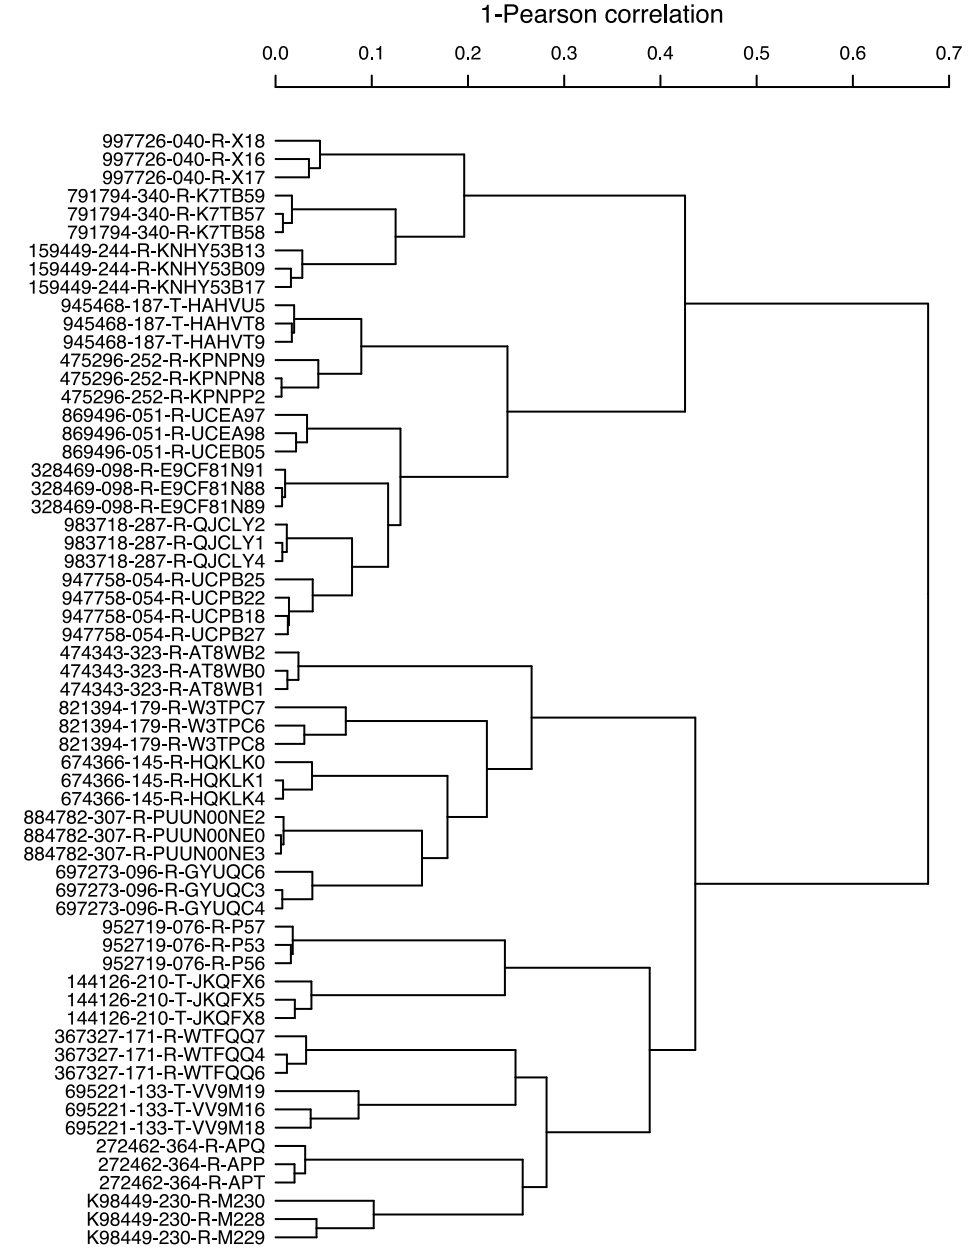

Figure S1C

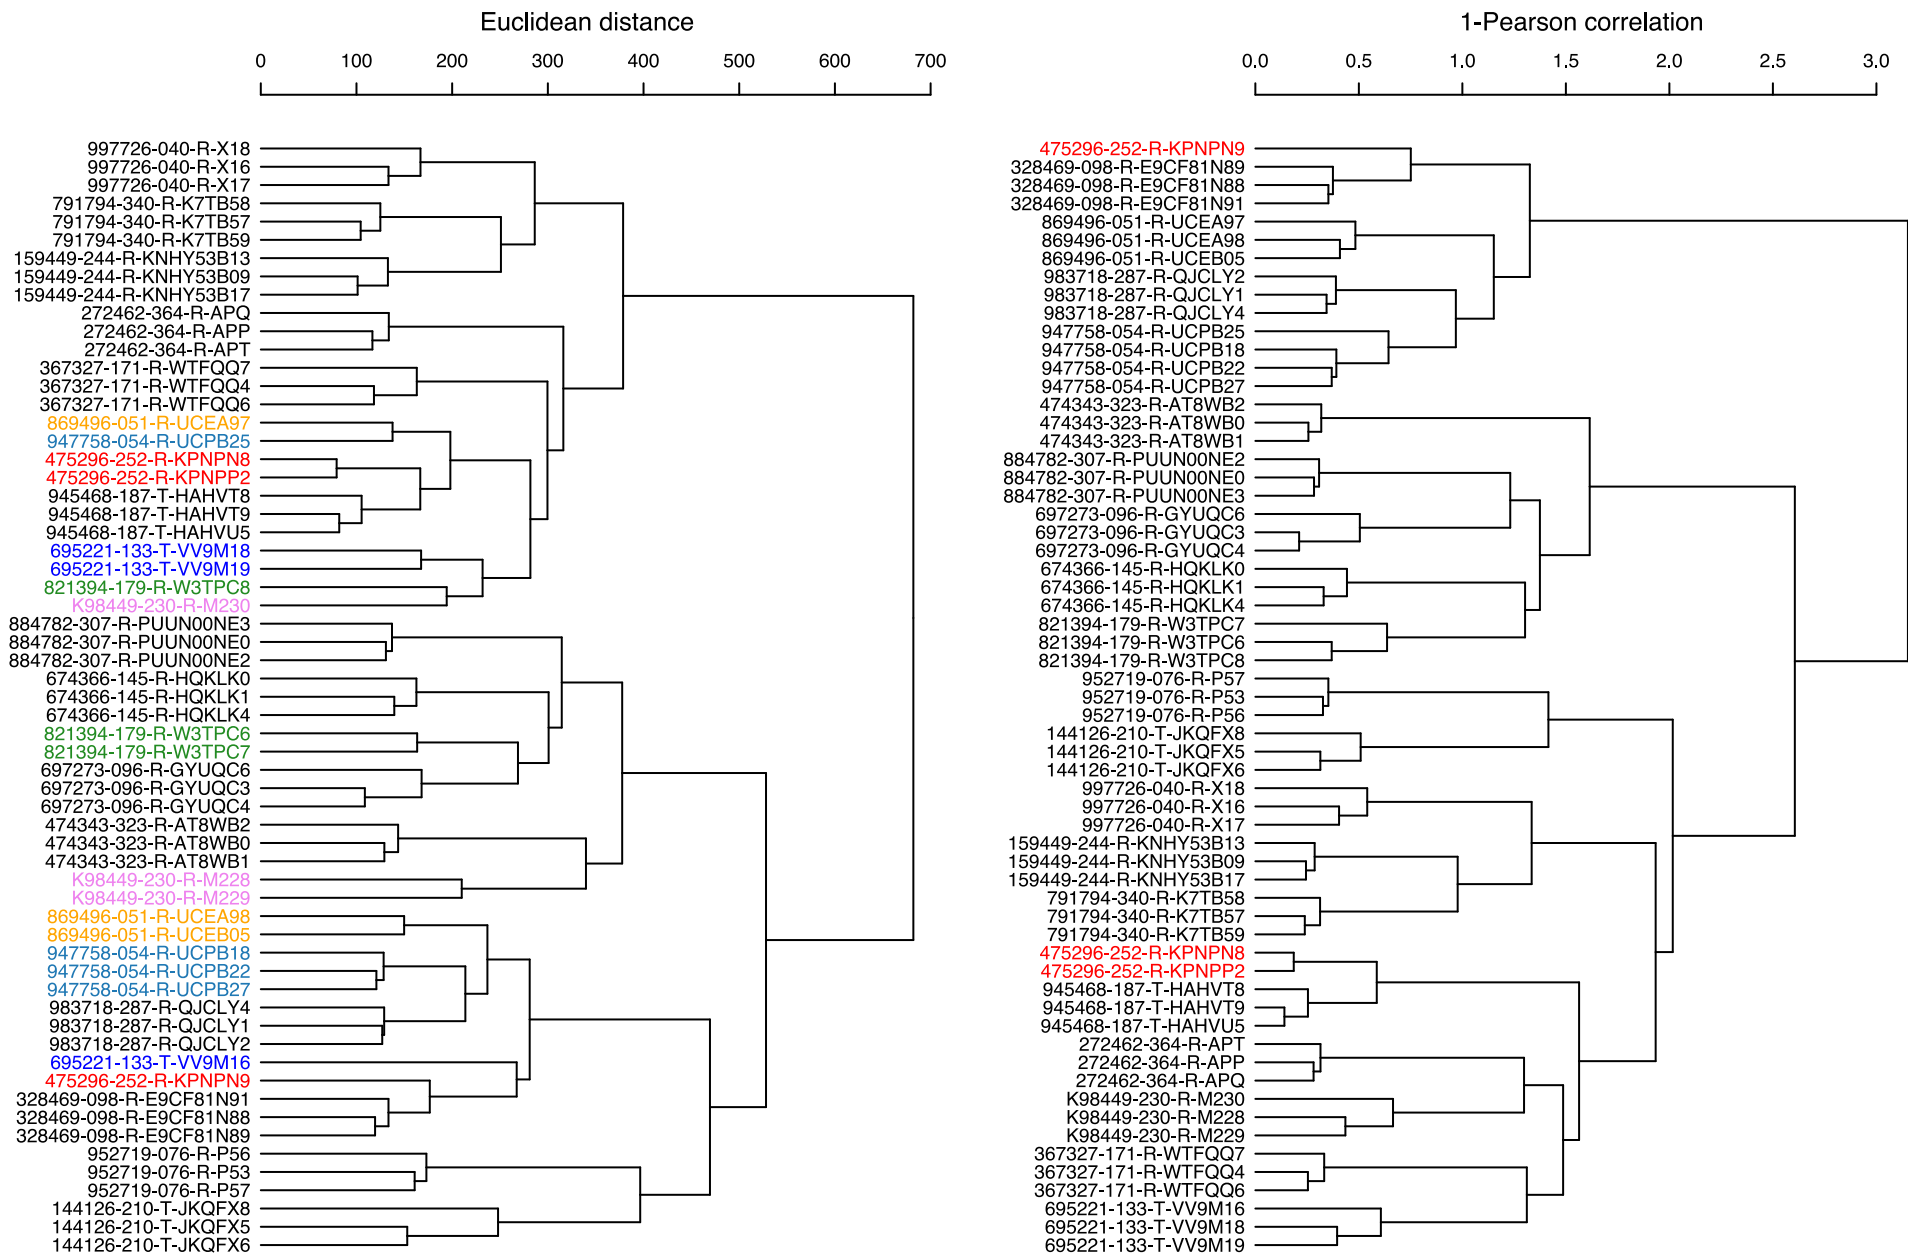

Figure S2

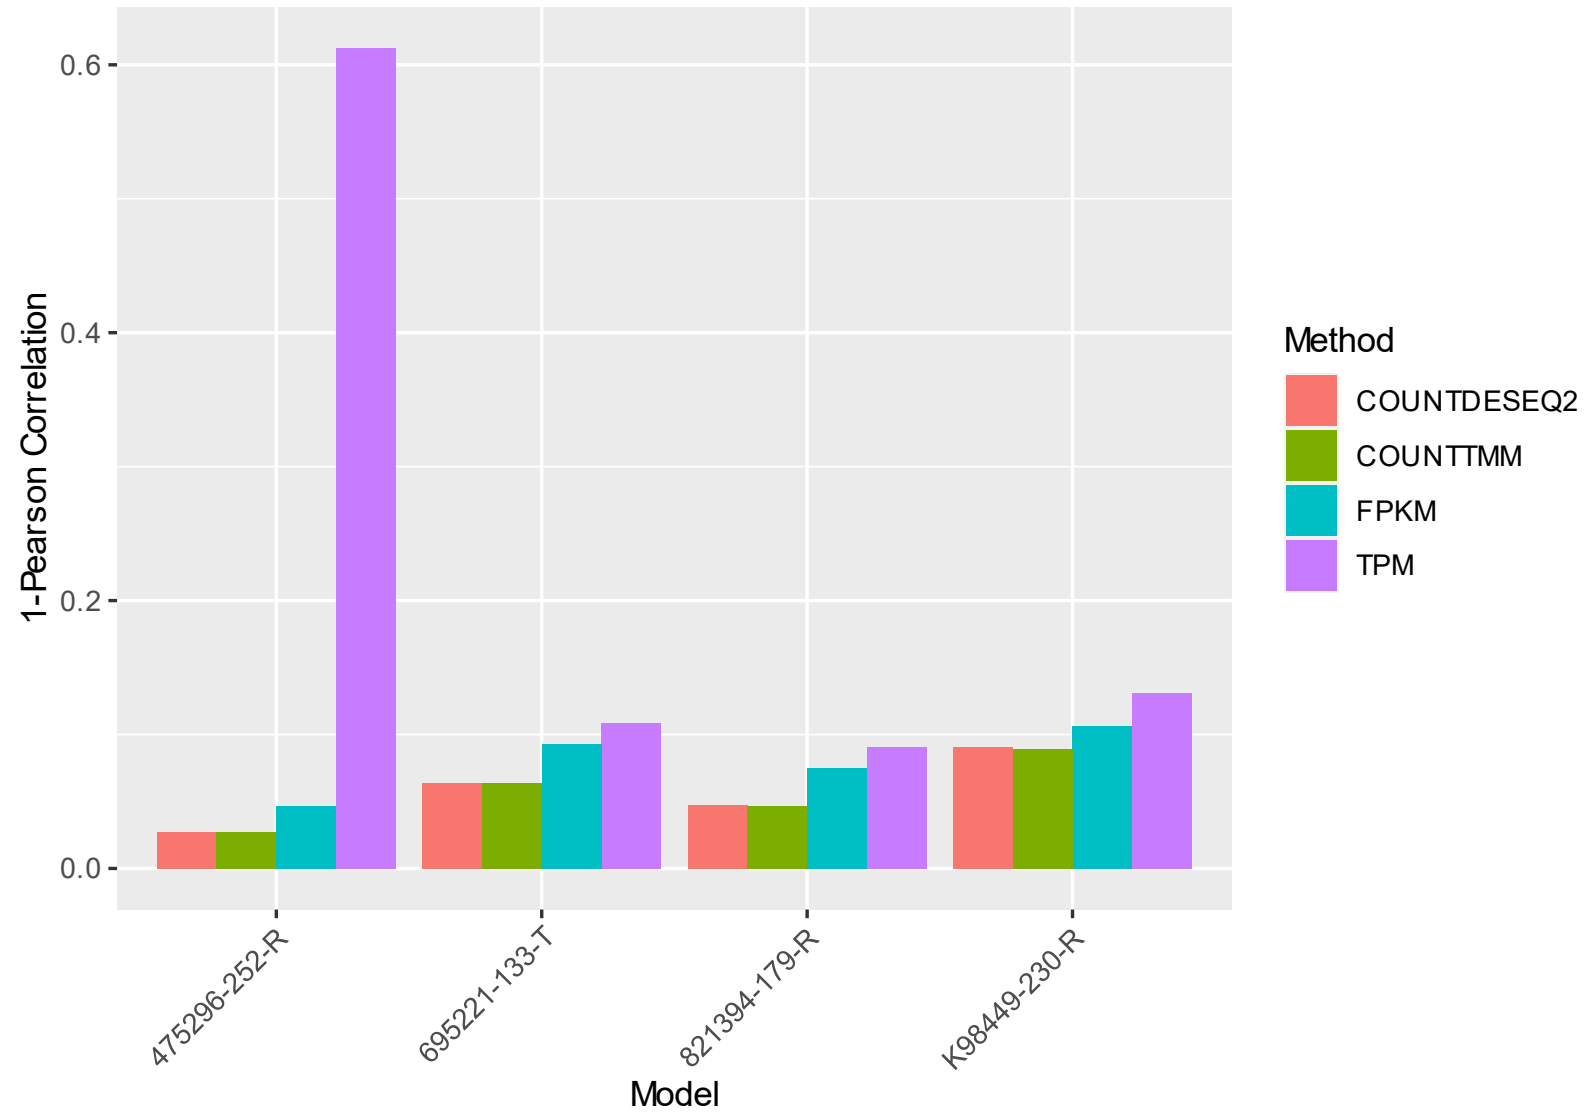

Figure S3A

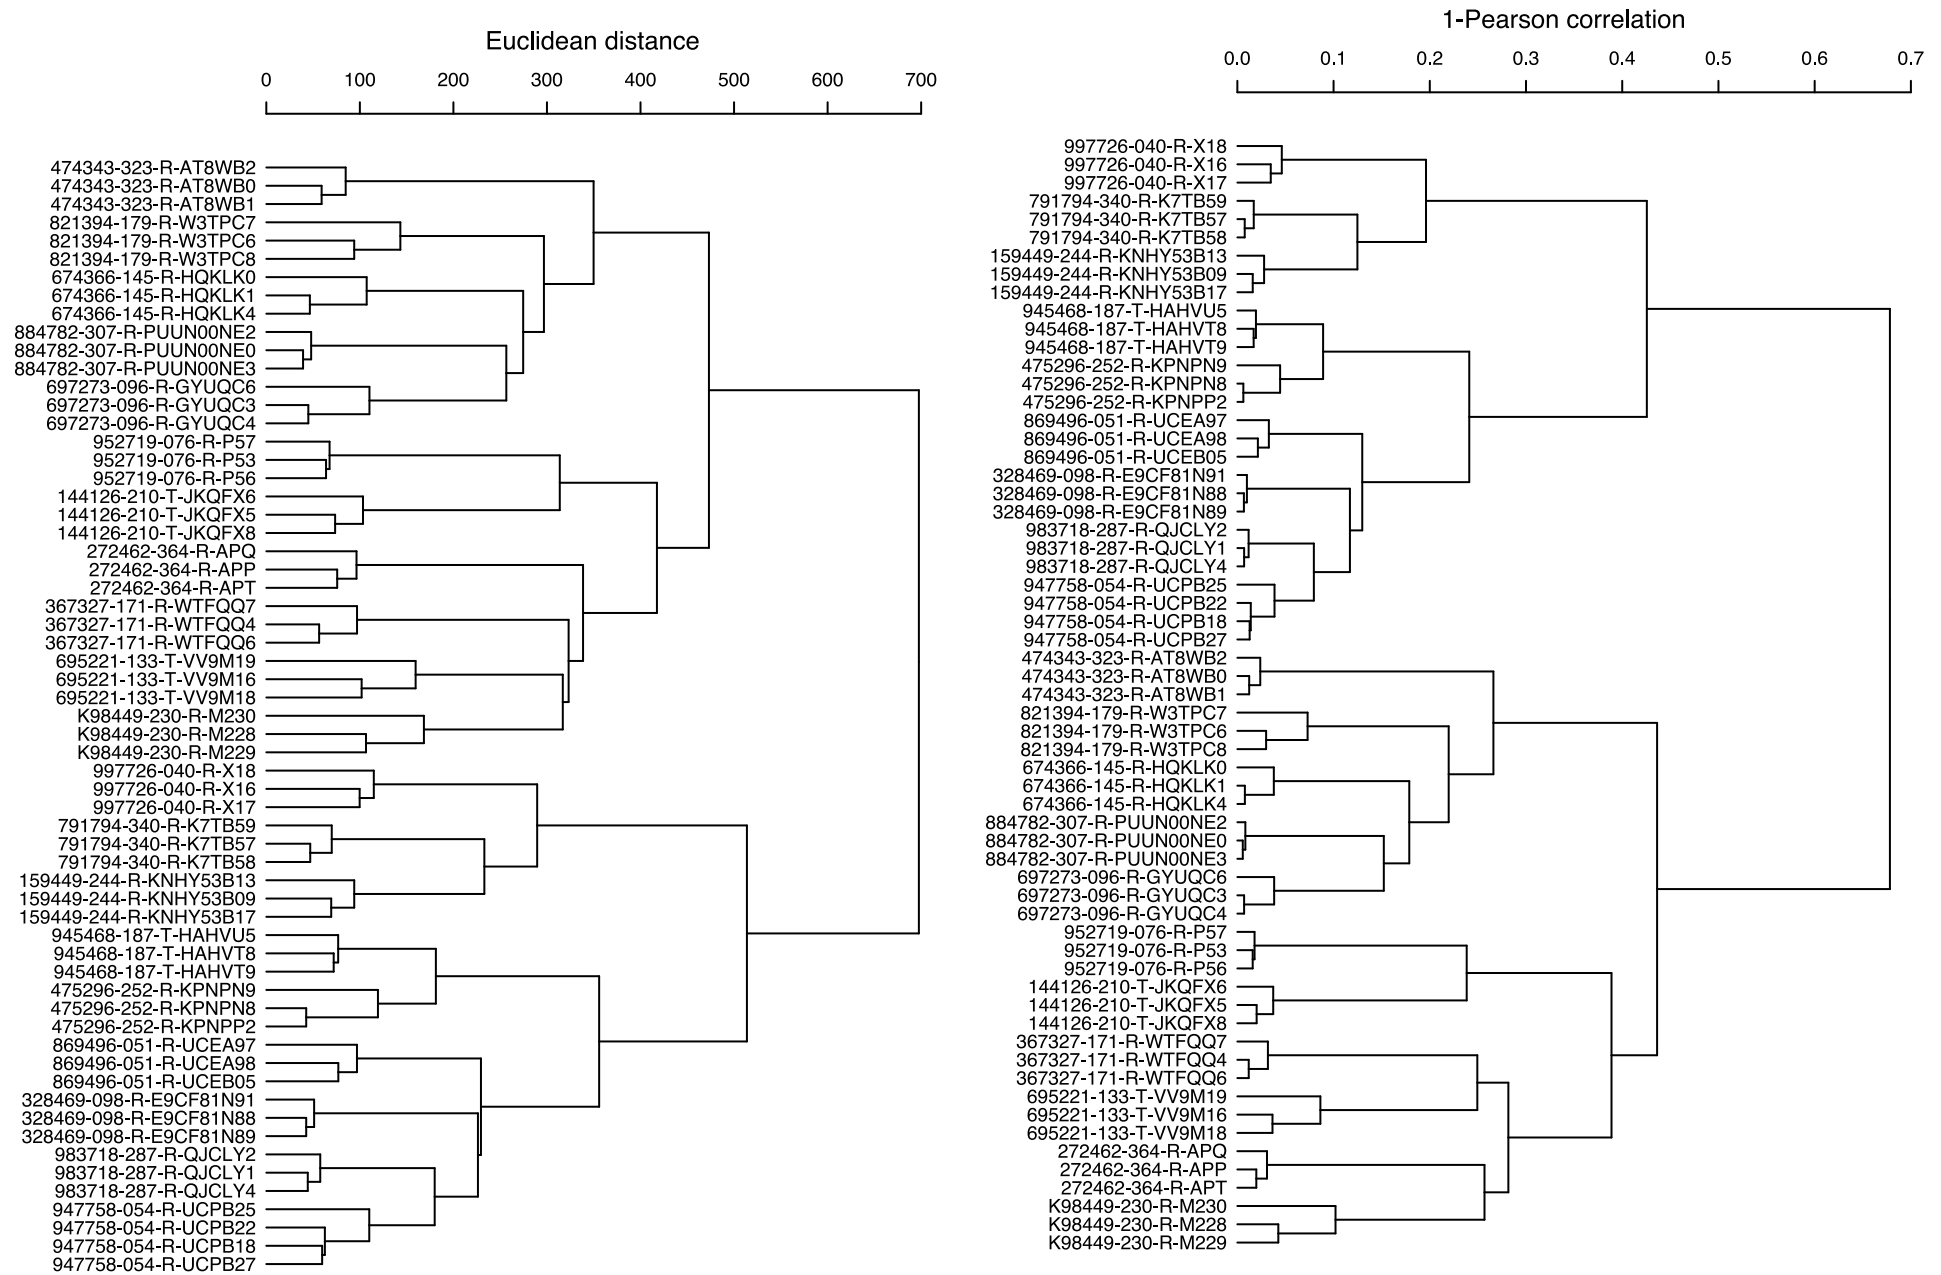

Figure S3B

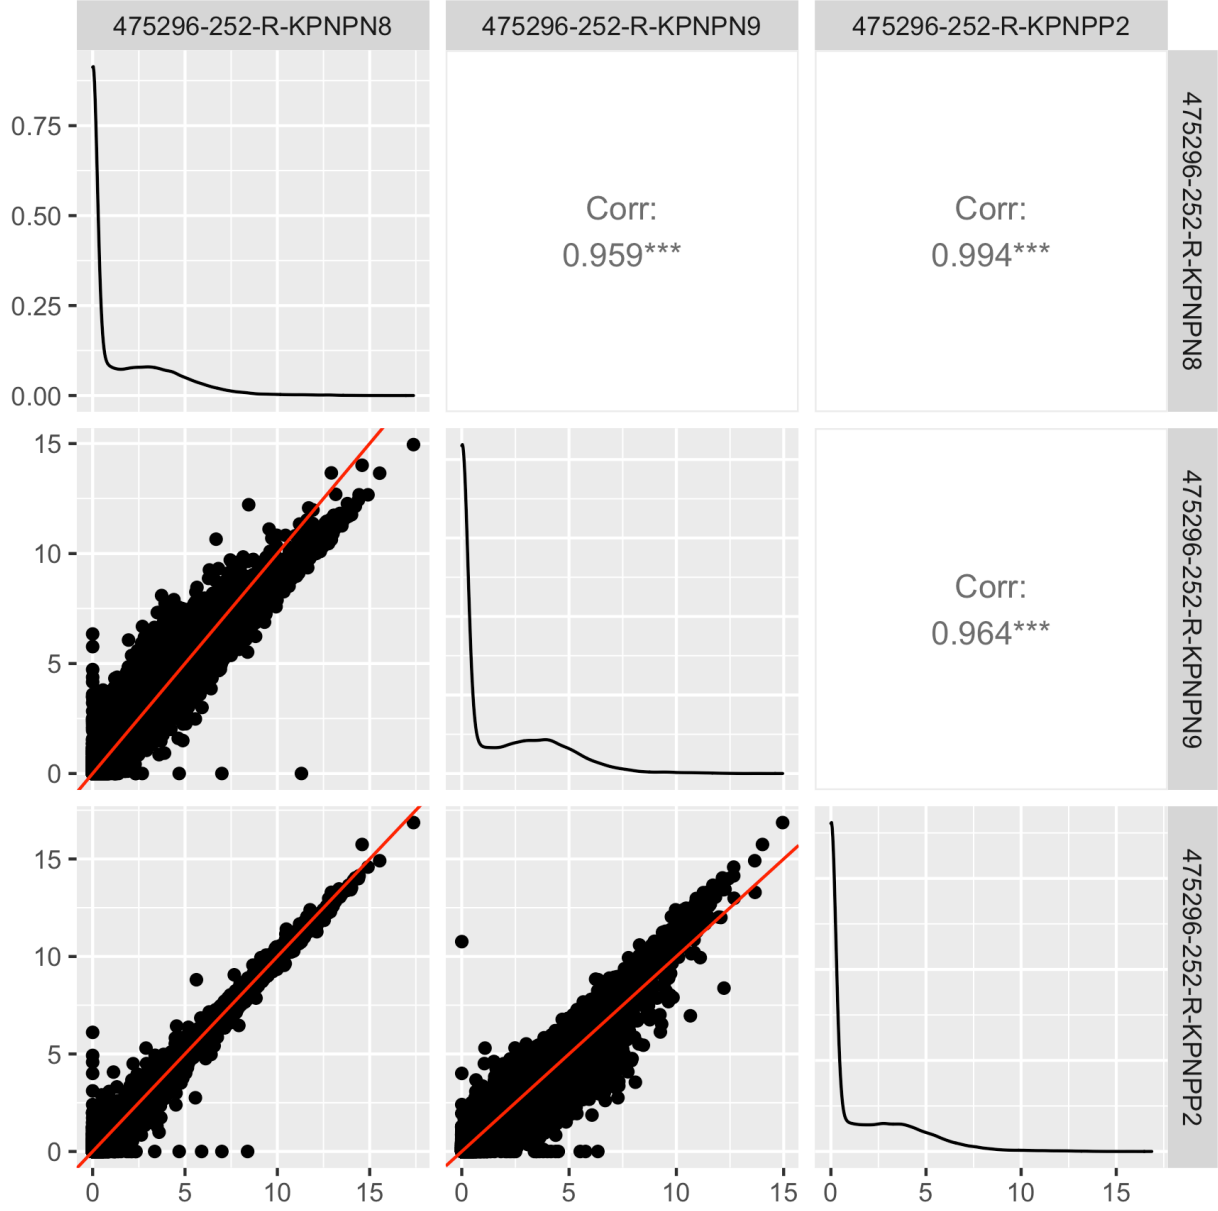

Figure S4

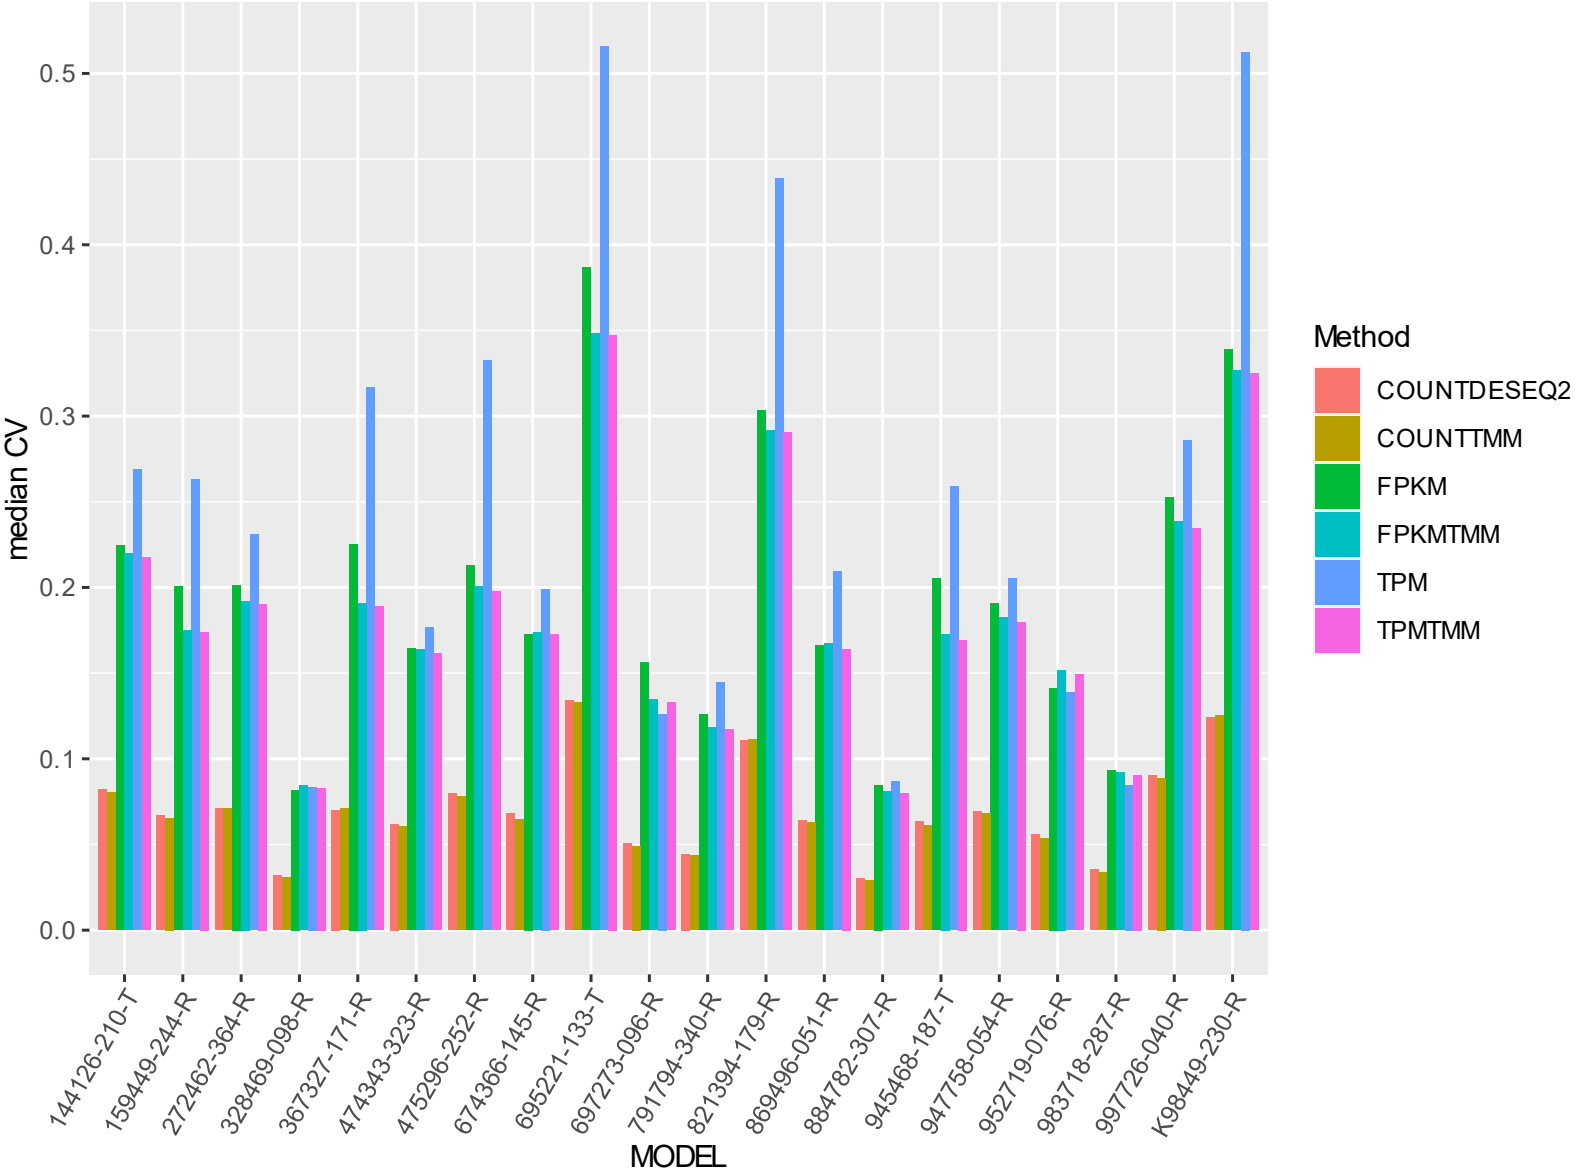

Figure S5A

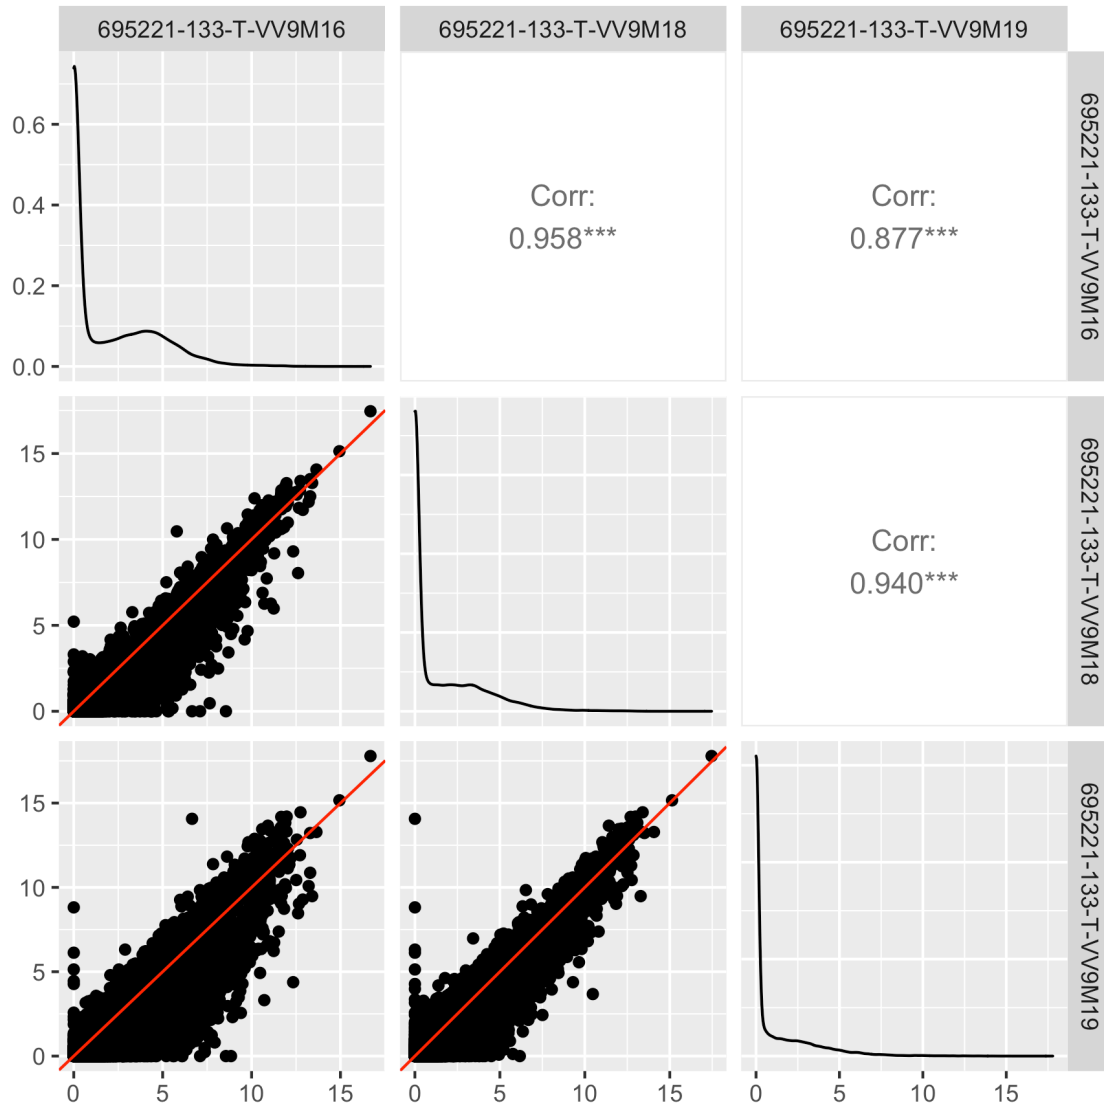

Figure S5B

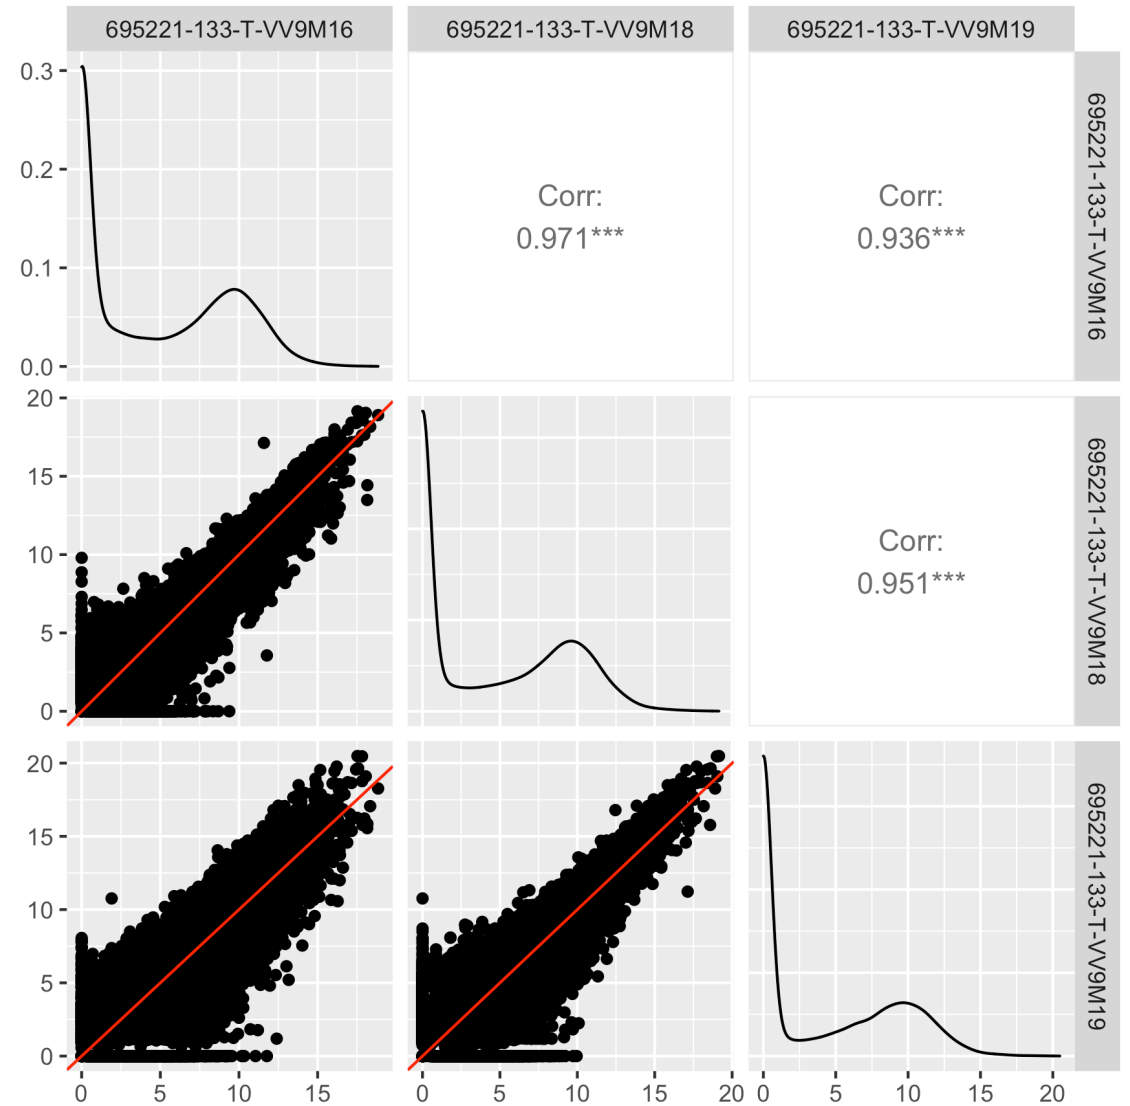



Figure S6A

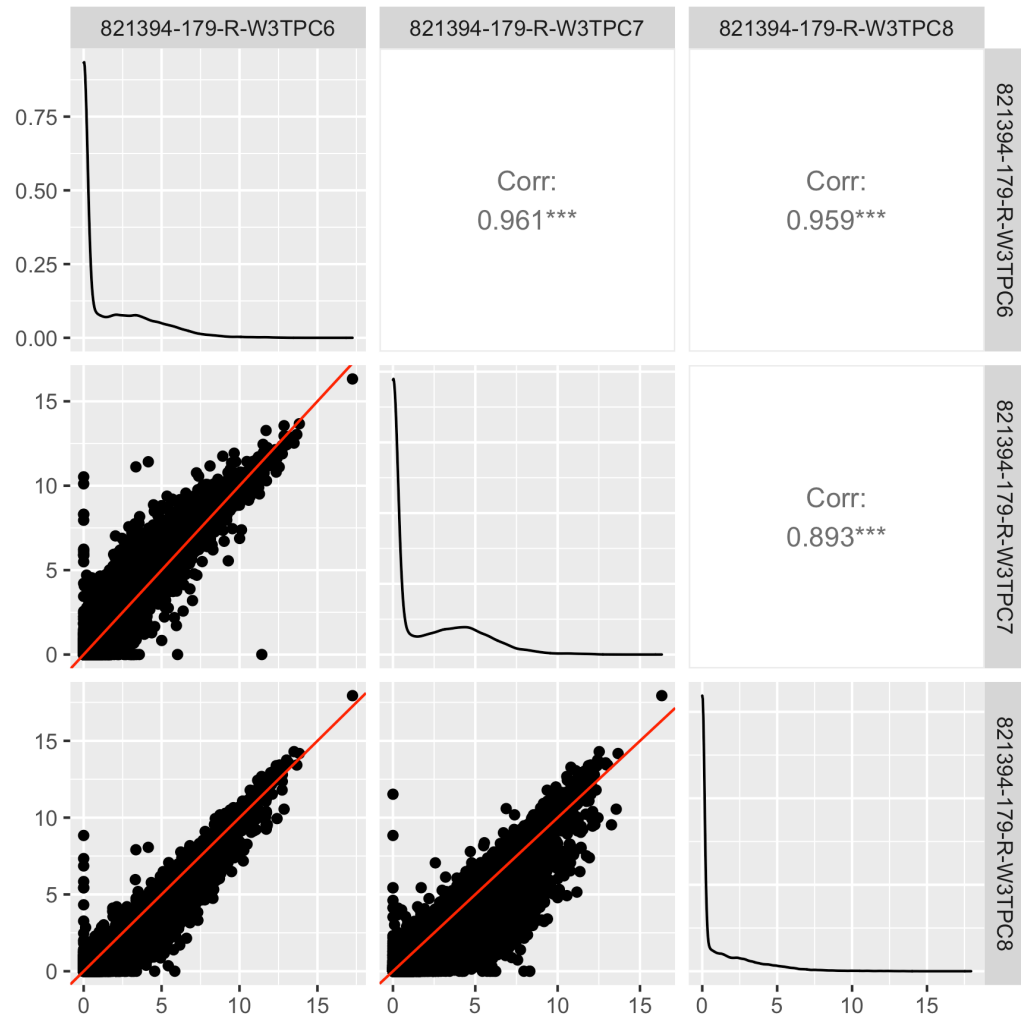

Figure S6B

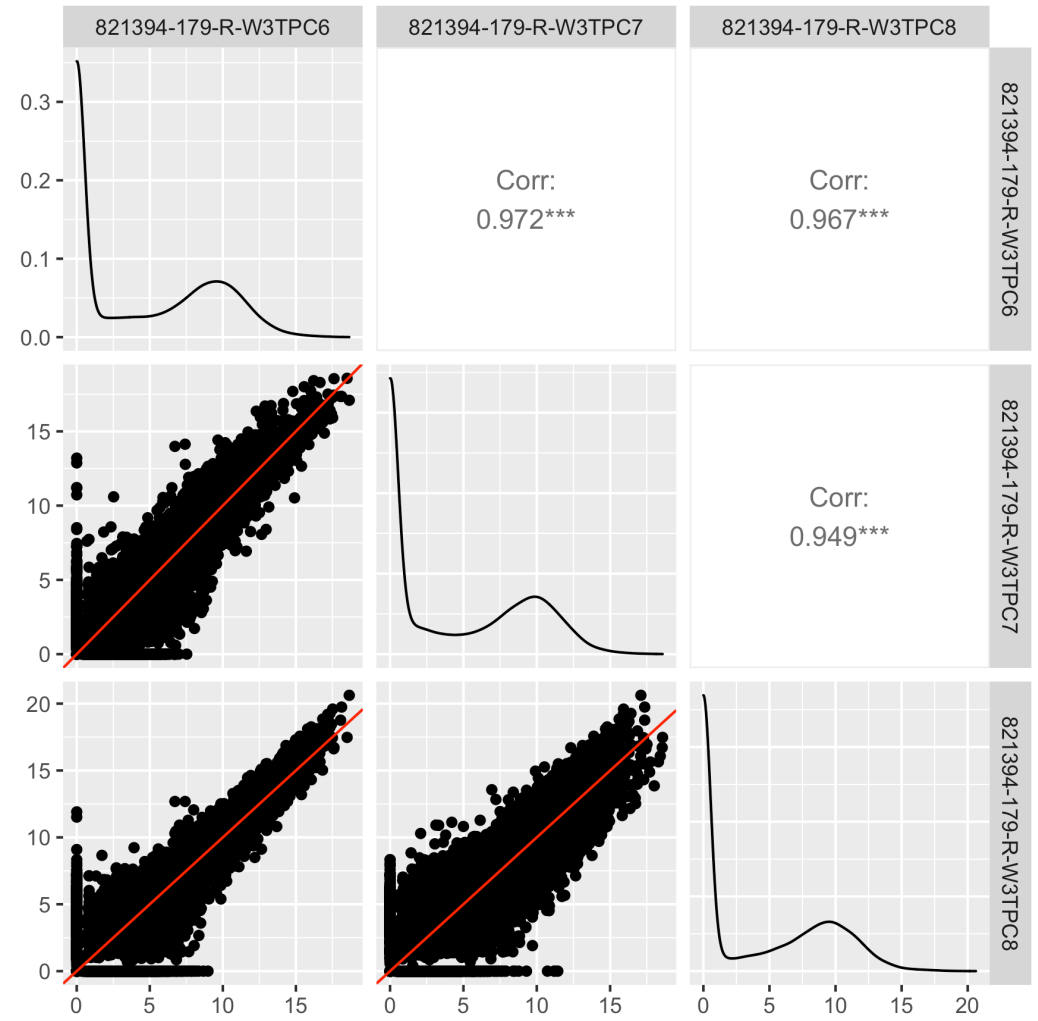

Figure S7A

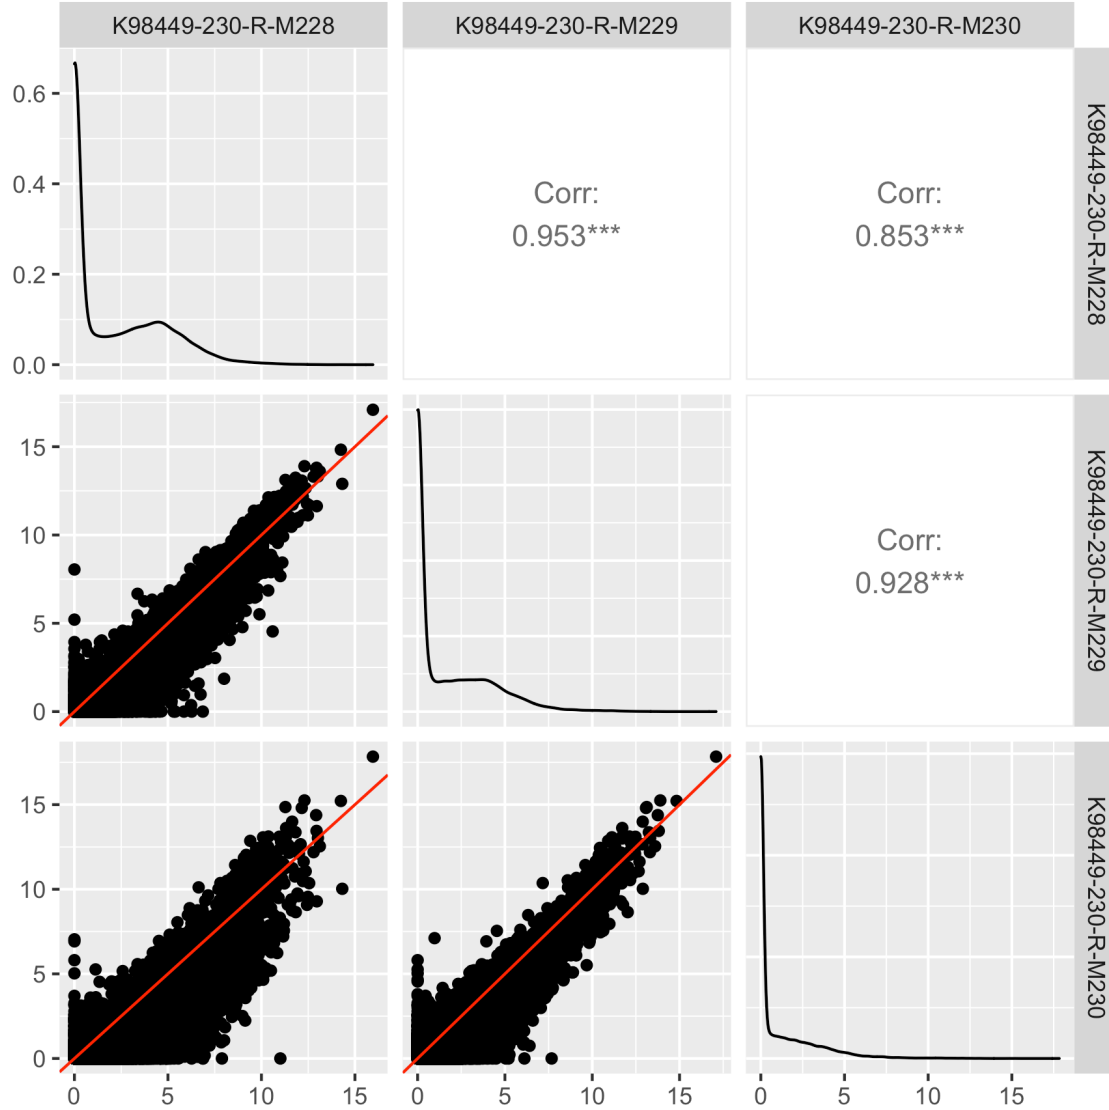

Figure S7B

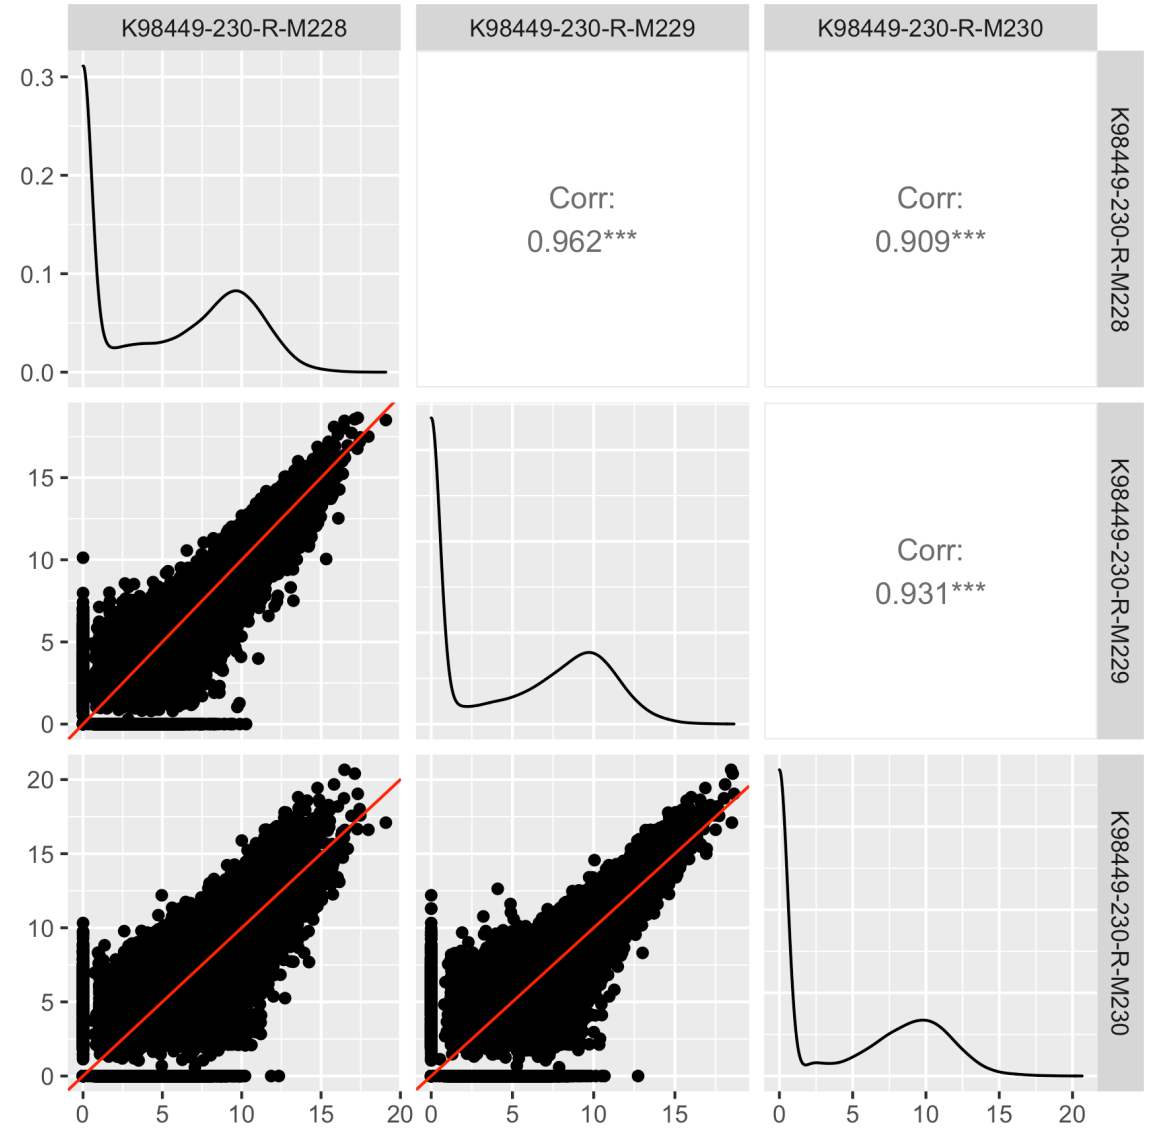

Figure S8A

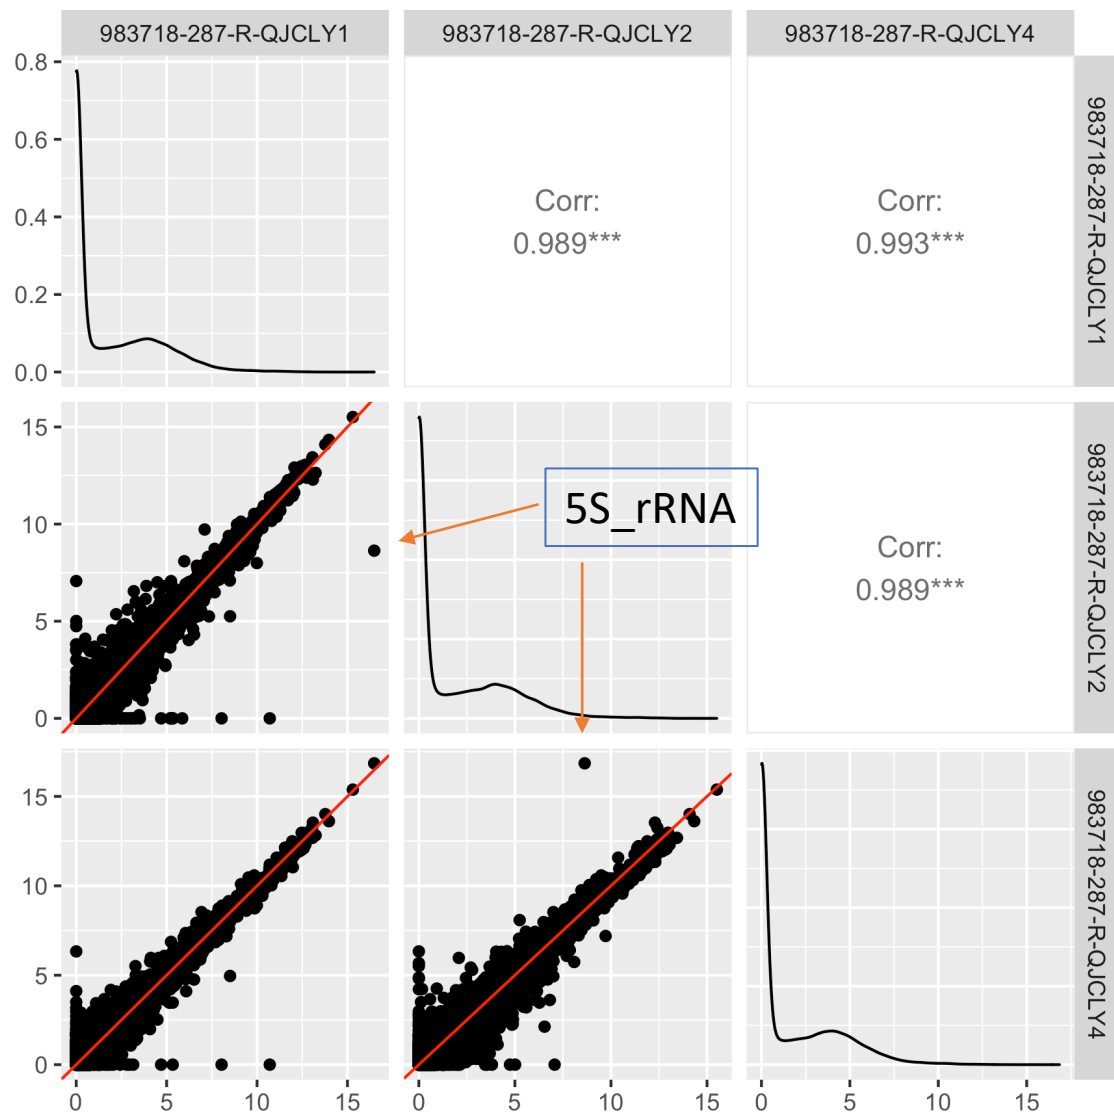

Figure S8B

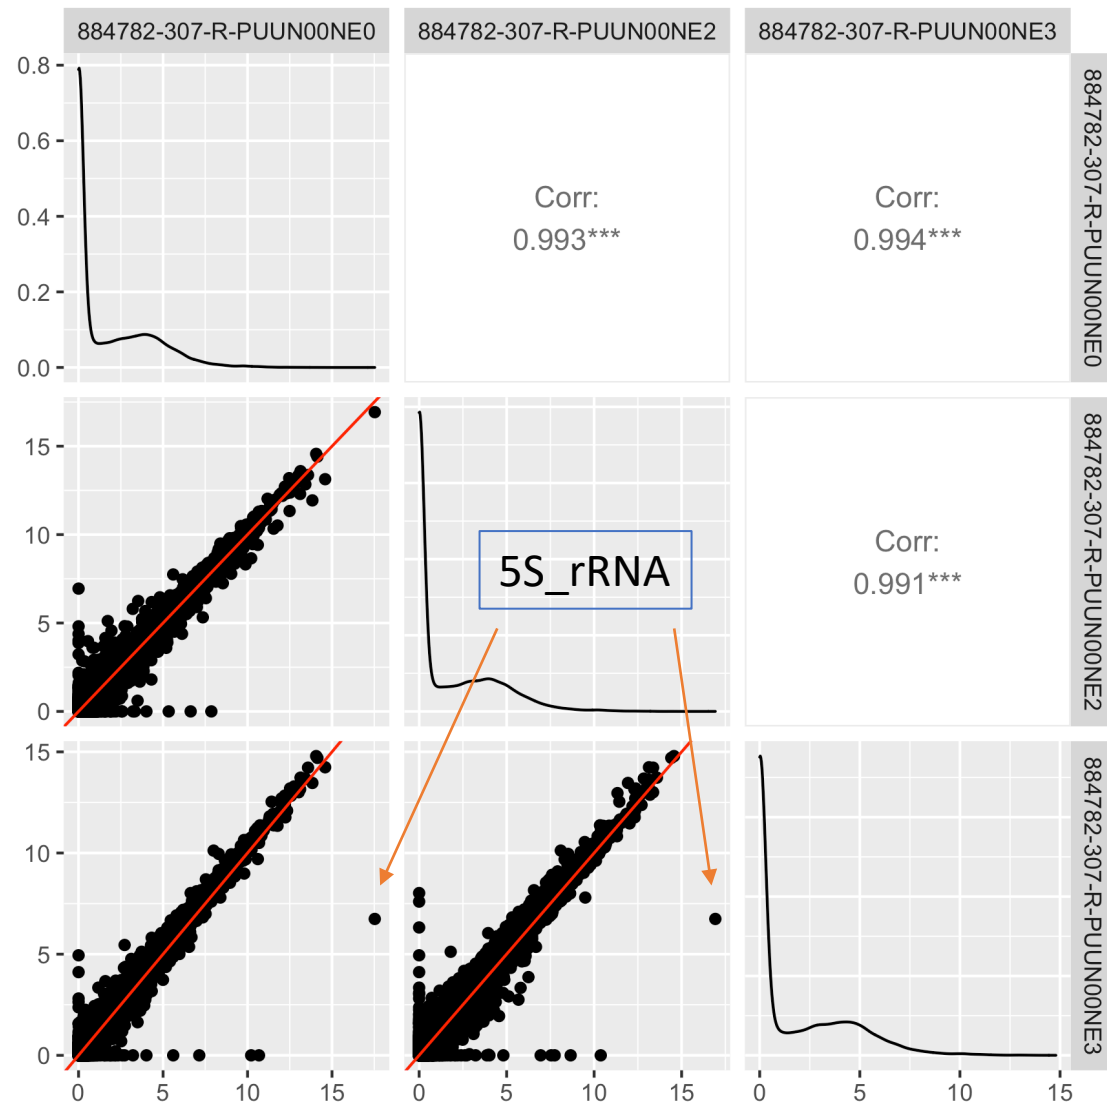

**Table S1. Details of the patient-derived xenograft samples used in this study (downloaded on Sept. 16, 2020 from the NCI PDMR database).**

| <b>EXPID</b> | <b>PatientID</b> | <b>SpecimenID</b> | <b>SampleID</b> | <b>Description</b>              | <b>DiseaseBodyLocation</b>   |
|--------------|------------------|-------------------|-----------------|---------------------------------|------------------------------|
| 1            | 144126           | 210-T             | JKQFX5          | Neuroendocrine cancer, NOS      | Endocrine and Neuroendocrine |
| 2            | 144126           | 210-T             | JKQFX6          | Neuroendocrine cancer, NOS      | Endocrine and Neuroendocrine |
| 3            | 144126           | 210-T             | JKQFX8          | Neuroendocrine cancer, NOS      | Endocrine and Neuroendocrine |
| 4            | 159449           | 244-R             | KNHY53B09       | Transitional cell car. - uroth. | Genitourinary                |
| 5            | 159449           | 244-R             | KNHY53B13       | Transitional cell car. - uroth. | Genitourinary                |
| 6            | 159449           | 244-R             | KNHY53B17       | Transitional cell car. - uroth. | Genitourinary                |
| 7            | 272462           | 364-R             | APP             | RCC, clear cell adenocarcinoma  | Genitourinary                |
| 8            | 272462           | 364-R             | APQ             | RCC, clear cell adenocarcinoma  | Genitourinary                |
| 9            | 272462           | 364-R             | APT             | RCC, clear cell adenocarcinoma  | Genitourinary                |
| 10           | 328469           | 098-R             | E9CF81N88       | Adenocarcinoma - colon          | Digestive/Gastrointestinal   |
| 11           | 328469           | 098-R             | E9CF81N89       | Adenocarcinoma - colon          | Digestive/Gastrointestinal   |
| 12           | 328469           | 098-R             | E9CF81N91       | Adenocarcinoma - colon          | Digestive/Gastrointestinal   |
| 13           | 367327           | 171-R             | WTFQQ4          | Salivary gland cancer           | Head and Neck                |
| 14           | 367327           | 171-R             | WTFQQ6          | Salivary gland cancer           | Head and Neck                |
| 15           | 367327           | 171-R             | WTFQQ7          | Salivary gland cancer           | Head and Neck                |
| 16           | 474343           | 323-R             | AT8WB0          | Osteosarcoma                    | Musculoskeletal              |
| 17           | 474343           | 323-R             | AT8WB1          | Osteosarcoma                    | Musculoskeletal              |
| 18           | 474343           | 323-R             | AT8WB2          | Osteosarcoma                    | Musculoskeletal              |
| 19           | 475296           | 252-R             | KPNPN8          | Adenocarcinoma - rectum         | Digestive/Gastrointestinal   |
| 20           | 475296           | 252-R             | KPNPN9          | Adenocarcinoma - rectum         | Digestive/Gastrointestinal   |
| 21           | 475296           | 252-R             | KPNPP2          | Adenocarcinoma - rectum         | Digestive/Gastrointestinal   |
| 22           | 674366           | 145-R             | HQKLN0          | Non-Rhabdo. soft tissue sarcoma | Musculoskeletal              |
| 23           | 674366           | 145-R             | HQKLN1          | Non-Rhabdo. soft tissue sarcoma | Musculoskeletal              |
| 24           | 674366           | 145-R             | HQKLN4          | Non-Rhabdo. soft tissue sarcoma | Musculoskeletal              |
| 25           | 695221           | 133-T             | VV9M16          | Melanoma                        | Skin                         |
| 26           | 695221           | 133-T             | VV9M18          | Melanoma                        | Skin                         |
| 27           | 695221           | 133-T             | VV9M19          | Melanoma                        | Skin                         |
| 28           | 697273           | 096-R             | GYUQC3          | Fibrosarcoma - not infantile    | Musculoskeletal              |
| 29           | 697273           | 096-R             | GYUQC4          | Fibrosarcoma - not infantile    | Musculoskeletal              |
| 30           | 697273           | 096-R             | GYUQC6          | Fibrosarcoma - not infantile    | Musculoskeletal              |
| 31           | 791794           | 340-R             | K7TB57          | Squamous cervical cancer        | Gynecologic                  |

|    |        |       |           |                                 |                            |
|----|--------|-------|-----------|---------------------------------|----------------------------|
| 32 | 791794 | 340-R | K7TB58    | Squamous cervical cancer        | Gynecologic                |
| 33 | 791794 | 340-R | K7TB59    | Squamous cervical cancer        | Gynecologic                |
| 34 | 821394 | 179-R | W3TPC6    | Malignant fibrous histiocytoma  | Musculoskeletal            |
| 35 | 821394 | 179-R | W3TPC7    | Malignant fibrous histiocytoma  | Musculoskeletal            |
| 36 | 821394 | 179-R | W3TPC8    | Malignant fibrous histiocytoma  | Musculoskeletal            |
| 37 | 869496 | 051-R | UCEA97    | Adenocarcinoma - rectum         | Digestive/Gastrointestinal |
| 38 | 869496 | 051-R | UCEA98    | Adenocarcinoma - rectum         | Digestive/Gastrointestinal |
| 39 | 869496 | 051-R | UCEB05    | Adenocarcinoma - rectum         | Digestive/Gastrointestinal |
| 40 | 884782 | 307-R | PUUN00NE0 | Non-Rhabdo. soft tissue sarcoma | Musculoskeletal            |
| 41 | 884782 | 307-R | PUUN00NE2 | Non-Rhabdo. soft tissue sarcoma | Musculoskeletal            |
| 42 | 884782 | 307-R | PUUN00NE3 | Non-Rhabdo. soft tissue sarcoma | Musculoskeletal            |
| 43 | 945468 | 187-T | HAHVT8    | Adenocarcinoma - rectum         | Digestive/Gastrointestinal |
| 44 | 945468 | 187-T | HAHVT9    | Adenocarcinoma - rectum         | Digestive/Gastrointestinal |
| 45 | 945468 | 187-T | HAHVU5    | Adenocarcinoma - rectum         | Digestive/Gastrointestinal |
| 46 | 947758 | 054-R | UCPB18    | Adenocarcinoma - colon          | Digestive/Gastrointestinal |
| 47 | 947758 | 054-R | UCPB22    | Adenocarcinoma - colon          | Digestive/Gastrointestinal |
| 48 | 947758 | 054-R | UCPB25    | Adenocarcinoma - colon          | Digestive/Gastrointestinal |
| 49 | 947758 | 054-R | UCPB27    | Adenocarcinoma - colon          | Digestive/Gastrointestinal |
| 50 | 952719 | 076-R | P53       | Lung adenocarcinoma             | Respiratory/Thoracic       |
| 51 | 952719 | 076-R | P56       | Lung adenocarcinoma             | Respiratory/Thoracic       |
| 52 | 952719 | 076-R | P57       | Lung adenocarcinoma             | Respiratory/Thoracic       |
| 53 | 983718 | 287-R | QJCLY1    | Adenocarcinoma - colon          | Digestive/Gastrointestinal |
| 54 | 983718 | 287-R | QJCLY2    | Adenocarcinoma - colon          | Digestive/Gastrointestinal |
| 55 | 983718 | 287-R | QJCLY4    | Adenocarcinoma - colon          | Digestive/Gastrointestinal |
| 56 | 997726 | 040-R | X16       | Squamous cell lung carcinoma    | Respiratory/Thoracic       |
| 57 | 997726 | 040-R | X17       | Squamous cell lung carcinoma    | Respiratory/Thoracic       |
| 58 | 997726 | 040-R | X18       | Squamous cell lung carcinoma    | Respiratory/Thoracic       |
| 59 | K98449 | 230-R | M228      | Glioblastoma multiforme         | Neurologic                 |
| 60 | K98449 | 230-R | M229      | Glioblastoma multiforme         | Neurologic                 |
| 61 | K98449 | 230-R | M230      | Glioblastoma multiforme         | Neurologic                 |

**Table S2. Summary statistics for CV values including interquartile range for different quantitative measures.**

| <b>model</b> | <b>method</b> | <b>25</b> | <b>50</b> | <b>75</b> | <b>IQR</b> |
|--------------|---------------|-----------|-----------|-----------|------------|
| 144126-210-T | COUNTDESEQ2   | 0.0388    | 0.0822    | 0.7792    | 0.7403     |
| 144126-210-T | COUNTTMM      | 0.0389    | 0.0805    | 0.7485    | 0.7096     |
| 144126-210-T | FPKM          | 0.0882    | 0.2246    | 0.9002    | 0.8119     |
| 144126-210-T | TPM           | 0.1049    | 0.2687    | 0.9043    | 0.7993     |
| 159449-244-R | COUNTDESEQ2   | 0.0317    | 0.0668    | 0.3207    | 0.289      |
| 159449-244-R | COUNTTMM      | 0.0311    | 0.0654    | 0.3146    | 0.2835     |
| 159449-244-R | FPKM          | 0.086     | 0.2006    | 0.7264    | 0.6404     |
| 159449-244-R | TPM           | 0.1231    | 0.263     | 0.7605    | 0.6374     |
| 272462-364-R | COUNTDESEQ2   | 0.0371    | 0.071     | 0.26      | 0.2229     |
| 272462-364-R | COUNTTMM      | 0.0361    | 0.0708    | 0.2553    | 0.2193     |
| 272462-364-R | FPKM          | 0.0894    | 0.2015    | 0.6533    | 0.5639     |
| 272462-364-R | TPM           | 0.0956    | 0.231     | 0.6801    | 0.5845     |
| 328469-098-R | COUNTDESEQ2   | 0.0149    | 0.032     | 0.1669    | 0.152      |
| 328469-098-R | COUNTTMM      | 0.0144    | 0.0308    | 0.1602    | 0.1458     |
| 328469-098-R | FPKM          | 0.0346    | 0.0818    | 0.4108    | 0.3761     |
| 328469-098-R | TPM           | 0.0364    | 0.0835    | 0.4074    | 0.371      |
| 367327-171-R | COUNTDESEQ2   | 0.0357    | 0.0701    | 0.2526    | 0.2168     |
| 367327-171-R | COUNTTMM      | 0.0352    | 0.0709    | 0.2495    | 0.2143     |
| 367327-171-R | FPKM          | 0.0887    | 0.2254    | 0.6241    | 0.5354     |
| 367327-171-R | TPM           | 0.1383    | 0.3166    | 0.6806    | 0.5423     |
| 474343-323-R | COUNTDESEQ2   | 0.0321    | 0.0619    | 0.2804    | 0.2483     |
| 474343-323-R | COUNTTMM      | 0.0315    | 0.0606    | 0.2721    | 0.2406     |
| 474343-323-R | FPKM          | 0.0765    | 0.1645    | 0.6113    | 0.5348     |
| 474343-323-R | TPM           | 0.0699    | 0.1765    | 0.6362    | 0.5663     |
| 475296-252-R | COUNTDESEQ2   | 0.0393    | 0.0796    | 0.2981    | 0.2588     |
| 475296-252-R | COUNTTMM      | 0.0383    | 0.0781    | 0.2888    | 0.2505     |
| 475296-252-R | FPKM          | 0.0873    | 0.2129    | 0.6867    | 0.5993     |
| 475296-252-R | TPM           | 0.1283    | 0.3324    | 0.8541    | 0.7259     |
| 674366-145-R | COUNTDESEQ2   | 0.0324    | 0.068     | 0.3453    | 0.313      |
| 674366-145-R | COUNTTMM      | 0.0309    | 0.0648    | 0.3332    | 0.3023     |
| 674366-145-R | FPKM          | 0.0767    | 0.1728    | 0.6533    | 0.5766     |
| 674366-145-R | TPM           | 0.0894    | 0.199     | 0.6672    | 0.5778     |
| 695221-133-T | COUNTDESEQ2   | 0.0618    | 0.134     | 0.8681    | 0.8063     |
| 695221-133-T | COUNTTMM      | 0.061     | 0.1331    | 0.8677    | 0.8067     |
| 695221-133-T | FPKM          | 0.1527    | 0.3867    | 0.9352    | 0.7824     |
| 695221-133-T | TPM           | 0.2195    | 0.5157    | 0.9984    | 0.7789     |
| 697273-096-R | COUNTDESEQ2   | 0.0203    | 0.0506    | 0.8666    | 0.8463     |
| 697273-096-R | COUNTTMM      | 0.02      | 0.0491    | 0.8663    | 0.8463     |
| 697273-096-R | FPKM          | 0.0549    | 0.1561    | 1.0467    | 0.9918     |
| 697273-096-R | TPM           | 0.0463    | 0.1261    | 0.9968    | 0.9504     |
| 791794-340-R | COUNTDESEQ2   | 0.0214    | 0.0445    | 0.2017    | 0.1803     |
| 791794-340-R | COUNTTMM      | 0.021     | 0.0437    | 0.1956    | 0.1746     |
| 791794-340-R | FPKM          | 0.0558    | 0.126     | 0.4886    | 0.4328     |
| 791794-340-R | TPM           | 0.0607    | 0.1443    | 0.4859    | 0.4252     |
| 821394-179-R | COUNTDESEQ2   | 0.0544    | 0.1105    | 0.4192    | 0.3648     |
| 821394-179-R | COUNTTMM      | 0.0545    | 0.1114    | 0.4174    | 0.3629     |
| 821394-179-R | FPKM          | 0.1346    | 0.3034    | 0.861     | 0.7264     |
| 821394-179-R | TPM           | 0.1906    | 0.4387    | 0.8898    | 0.6992     |
| 869496-051-R | COUNTDESEQ2   | 0.033     | 0.064     | 0.2138    | 0.1808     |

|              |             |        |        |        |        |
|--------------|-------------|--------|--------|--------|--------|
| 869496-051-R | COUNTTMM    | 0.0323 | 0.0628 | 0.211  | 0.1787 |
| 869496-051-R | FPKM        | 0.0758 | 0.1662 | 0.5519 | 0.4761 |
| 869496-051-R | TPM         | 0.101  | 0.2091 | 0.5897 | 0.4887 |
| 884782-307-R | COUNTDESEQ2 | 0.0143 | 0.0301 | 0.1917 | 0.1774 |
| 884782-307-R | COUNTTMM    | 0.0139 | 0.0291 | 0.1856 | 0.1716 |
| 884782-307-R | FPKM        | 0.039  | 0.0848 | 0.4377 | 0.3986 |
| 884782-307-R | TPM         | 0.0415 | 0.0866 | 0.4268 | 0.3852 |
| 945468-187-T | COUNTDESEQ2 | 0.0267 | 0.0636 | 0.5057 | 0.479  |
| 945468-187-T | COUNTTMM    | 0.0261 | 0.061  | 0.4902 | 0.4642 |
| 945468-187-T | FPKM        | 0.0759 | 0.2053 | 0.8735 | 0.7976 |
| 945468-187-T | TPM         | 0.1096 | 0.2587 | 0.8676 | 0.7579 |
| 947758-054-R | COUNTDESEQ2 | 0.0328 | 0.0691 | 0.415  | 0.3822 |
| 947758-054-R | COUNTTMM    | 0.0324 | 0.0681 | 0.4063 | 0.3739 |
| 947758-054-R | FPKM        | 0.0864 | 0.1907 | 0.731  | 0.6447 |
| 947758-054-R | TPM         | 0.0855 | 0.2052 | 0.7268 | 0.6413 |
| 952719-076-R | COUNTDESEQ2 | 0.0267 | 0.0557 | 0.2697 | 0.243  |
| 952719-076-R | COUNTTMM    | 0.0259 | 0.0535 | 0.2625 | 0.2367 |
| 952719-076-R | FPKM        | 0.0614 | 0.1413 | 0.5791 | 0.5177 |
| 952719-076-R | TPM         | 0.0662 | 0.1387 | 0.568  | 0.5018 |
| 983718-287-R | COUNTDESEQ2 | 0.0156 | 0.0353 | 0.1996 | 0.1839 |
| 983718-287-R | COUNTTMM    | 0.0151 | 0.0335 | 0.1919 | 0.1768 |
| 983718-287-R | FPKM        | 0.0367 | 0.0931 | 0.4723 | 0.4356 |
| 983718-287-R | TPM         | 0.0344 | 0.0846 | 0.4564 | 0.422  |
| 997726-040-R | COUNTDESEQ2 | 0.0473 | 0.0902 | 0.3186 | 0.2714 |
| 997726-040-R | COUNTTMM    | 0.047  | 0.0887 | 0.3092 | 0.2622 |
| 997726-040-R | FPKM        | 0.1134 | 0.2526 | 0.7312 | 0.6178 |
| 997726-040-R | TPM         | 0.1219 | 0.286  | 0.7639 | 0.642  |
| K98449-230-R | COUNTDESEQ2 | 0.0597 | 0.124  | 0.8663 | 0.8066 |
| K98449-230-R | COUNTTMM    | 0.0603 | 0.1251 | 0.8663 | 0.806  |
| K98449-230-R | FPKM        | 0.1499 | 0.3389 | 0.9008 | 0.7509 |
| K98449-230-R | TPM         | 0.2457 | 0.5125 | 0.9615 | 0.7158 |

**Table S3A.** The transcript percentages in each sample for the top five most abundant genes in four PDX models whose TPM data had the highest median CV values.

|              |                 | <i>Top 5 most highly expressed transcripts in model</i> |                    |                 |                |                |                                    |
|--------------|-----------------|---------------------------------------------------------|--------------------|-----------------|----------------|----------------|------------------------------------|
| <b>Model</b> | <b>SampleID</b> | <b>RMRP</b>                                             | <b>TMSB4X</b>      | <b>SCARNA10</b> | <b>SCARNA2</b> | <b>SCARNA5</b> | <b>Total % TPM for top 5 genes</b> |
| K98449-230-R | M228            | 6.38                                                    | 1.94               | 0.50            | 0.78           | 0.46           | 10.06                              |
|              | M229            | 13.98                                                   | 2.91               | 1.53            | 1.38           | 0.87           | 20.67                              |
|              | M230            | 23.41                                                   | 3.81               | 3.89            | 2.13           | 2.86           | 36.10                              |
| <b>Model</b> | <b>SampleID</b> | <b>RMRP</b>                                             | <b>5S_rRNA</b>     | <b>RPS17L</b>   | <b>RPL9</b>    | <b>TMSB4X</b>  | <b>Total % TPM for top 5 genes</b> |
| 475296-252-R | KPNPN8          | 11.45                                                   | 1.66               | 3.21            | 2.07           | 1.48           | 19.89                              |
|              | KPNPN9          | 4.57                                                    | 2.39               | 1.86            | 0.94           | 0.94           | 10.69                              |
|              | KPNPP2          | 8.98                                                    | 4.13               | 2.31            | 1.85           | 1.35           | 18.62                              |
| <b>Model</b> | <b>SampleID</b> | <b>RMRP</b>                                             | <b>RPS17L</b>      | <b>RPL9</b>     | <b>RPL19</b>   | <b>UBB</b>     | <b>Total % TPM for top 5 genes</b> |
| 695221-133-T | VV9M16          | 10.55                                                   | 3.15               | 0.69            | 1.28           | 1.01           | 16.68                              |
|              | VV9M18          | 18.06                                                   | 3.59               | 1.08            | 1.72           | 1.17           | 25.62                              |
|              | VV9M19          | 22.62                                                   | 3.67               | 2.24            | 1.00           | 0.96           | 30.48                              |
| <b>Model</b> | <b>SampleID</b> | <b>RMRP</b>                                             | <b>Metazoa_SRP</b> | <b>RPL9</b>     | <b>TMSB4X</b>  | <b>RPS17L</b>  | <b>Total % TPM for top 5 genes</b> |
| 821394-179-R | W3TPC6          | 15.59                                                   | 1.47               | 1.16            | 1.31           | 0.91           | 20.43                              |
|              | W3TPC7          | 8.20                                                    | 1.30               | 0.59            | 0.84           | 0.77           | 11.70                              |
|              | W3TPC8          | 25.19                                                   | 1.85               | 2.01            | 1.10           | 1.21           | 31.37                              |

**Table S3B.** The transcript percentages in each sample for the top five most abundant genes in five PDX models whose TPM data had the lowest median CV values.

|              |                 | <i>Top 5 most highly expressed transcripts in model</i> |                   |               |                  |               |                                    |
|--------------|-----------------|---------------------------------------------------------|-------------------|---------------|------------------|---------------|------------------------------------|
| <b>Model</b> | <b>SampleID</b> | <b>RMRP</b>                                             | <b>5S_rRNA</b>    | <b>RPS17L</b> | <b>RPL9</b>      | <b>ACTB</b>   | <b>Total % TPM for top 5 genes</b> |
| 328469-098-R | E9CF81N88       | 7.08                                                    | 2.36              | 1.81          | 1.23             | 1.15          | 13.63                              |
|              | E9CF81N89       | 7.27                                                    | 3.28              | 2.17          | 1.49             | 0.97          | 15.18                              |
|              | E9CF81N91       | 7.02                                                    | 1.51              | 1.91          | 1.28             | 1.15          | 12.88                              |
| <b>Model</b> | <b>SampleID</b> | <b>5S_rRNA</b>                                          | <b>RMRP</b>       | <b>RPS17L</b> | <b>ACTB</b>      | <b>RPL9</b>   | <b>Total % TPM for top 5 genes</b> |
| 983718-287-R | QJCLY1          | 9.14                                                    | 4.02              | 1.61          | 1.40             | 0.86          | 17.03                              |
|              | QJCLY2          | 0.04                                                    | 4.67              | 2.06          | 1.75             | 1.11          | 9.63                               |
|              | QJCLY4          | 11.81                                                   | 4.26              | 1.25          | 1.65             | 0.66          | 19.64                              |
| <b>Model</b> | <b>SampleID</b> | <b>5S_rRNA</b>                                          | <b>RMRP</b>       | <b>ACTB</b>   | <b>NBPF10</b>    | <b>COL1A1</b> | <b>Total % TPM for top 5 genes</b> |
| 884782-307-R | PUUN00NE0       | 18.92                                                   | 1.71              | 1.80          | 2.47             | 1.22          | 26.12                              |
|              | PUUN00NE2       | 12.45                                                   | 2.42              | 2.18          | 0.90             | 1.06          | 19.01                              |
|              | PUUN00NE3       | 0.01                                                    | 2.84              | 2.67          | 1.93             | 1.91          | 9.35                               |
| <b>Model</b> | <b>SampleID</b> | <b>RMRP</b>                                             | <b>HIST2H2AA4</b> | <b>UBB</b>    | <b>HIST1H2BK</b> | <b>RPS17L</b> | <b>Total % TPM for top 5 genes</b> |
| 952719-076-R | P53             | 11.04                                                   | 1.70              | 1.24          | 1.17             | 1.04          | 16.20                              |
|              | P56             | 7.24                                                    | 1.86              | 1.29          | 1.14             | 0.93          | 12.46                              |
|              | P57             | 12.68                                                   | 1.11              | 0.64          | 0.77             | 1.08          | 16.28                              |
| <b>Model</b> | <b>SampleID</b> | <b>5S_rRNA</b>                                          | <b>KRT6A</b>      | <b>KRT5</b>   | <b>RMRP</b>      | <b>RPS17L</b> | <b>Total % TPM for top 5 genes</b> |
| 791794-340-R | K7TB57          | 9.76                                                    | 4.65              | 4.30          | 2.50             | 2.44          | 23.66                              |
|              | K7TB58          | 11.72                                                   | 4.92              | 4.71          | 2.57             | 2.34          | 26.26                              |
|              | K7TB59          | 12.52                                                   | 2.45              | 1.74          | 4.13             | 3.69          | 24.53                              |
